# Supplementary material for: Rapid and efficient removal of Sr2+ ions by the easy-to-operate and environmentally friendly KInSnS4@collagen fiber aerogel
Source: Royal Society of Chemistry journal article supplement (doi:10.1039/d4re00545g), 2025-01-01
Supplement: d4re00545g1.pdf [file d4re00545g1.pdf]

## Supplementary information

### Rapid and efficient removal of Sr<sup>2+</sup> ions by the easy-to-operate and environmentally friendly KInSnS<sub>4</sub>@collagen fibers aerogel

Jianghai He,<sup>a, c, d</sup> Junhao Tang,<sup>a</sup> Mingdong Zhang,<sup>b\*</sup> Chuan Lv,<sup>a</sup> Lu Yang,<sup>a</sup> Zhihua Chen,<sup>a</sup> Yi Liu,<sup>a</sup> Haiyan Sun,<sup>a</sup> Meiling Feng,<sup>a, c, d\*</sup> and Xiaoying Huang<sup>a, c, d</sup>

<sup>a</sup> State Key Laboratory of Structural Chemistry, Fujian Institute of Research on the Structure of Matter, Chinese Academy of Sciences, Fuzhou, Fujian 350002, P. R. China.

<sup>b</sup> Fujian Key Laboratory on Conservation and Sustainable Utilization of Marine Biodiversity, College of Geography and Oceanography, Minjiang University, Fuzhou 350108, PR China

<sup>c</sup> College of Chemistry, Fuzhou University, Fuzhou, 350116, Fujian, P. R. China.

<sup>d</sup> Fujian College, University of Chinese Academy of Sciences, Fuzhou 350002, P.R. China.

#### 1. Batch adsorption experiments.

In isothermal adsorption experiments, separate solutions were prepared with different initial concentrations of Sr<sup>2+</sup> ions ( $C_0^{\text{Sr}} = 5\text{--}200$  mg/L). The sample to solution ratios ( $m/V$ ) were all 1 g/L ( $m = 9$  mg,  $V = 9$  mL). Adsorption took place for about 12 h at room temperature. The filtered supernatant was diluted with 2% HNO<sub>3</sub> solution and finally tested using inductively coupled plasma emission spectroscopy (ICP-OES).

Kinetic experiments were carried out by adding 50 mg of KInSnS<sub>4</sub>@CFs aerogel to 50 ml of Sr<sup>2+</sup> ion solution ( $C_0^{\text{Sr}} = 16.15$  mg/L) at room temperature. The above mixture was stirred at specific adsorption time such as 1, 2, 3, 5, and 10 min. After that, an appropriate amount of supernatant was sampled, filtered, and then diluted with 2% HNO<sub>3</sub> solution. Finally, the Sr<sup>2+</sup> concentration was determined using ICP-OES.

For pH-dependent studies, the pH of aqueous Sr<sup>2+</sup> solutions was adjusted to 2 to 12 with HNO<sub>3</sub> or NaOH solutions. The initial concentrations of Sr<sup>2+</sup> ions ranged from 6.79 mg/L to 7.11 mg/L. Adsorption experiments were carried out at room temperature with a  $m/V$  of 1 g/L ( $m = 9$  mg,  $V = 9$  mL) and an adsorption time of about 12 h. The supernatant after filtration was diluted with 2% HNO<sub>3</sub> solution and finally tested by ICP-OES. The sample product after the adsorption process was separated from the solution, washed several times with water and ethanol and freeze-dried. The stability of KInSnS<sub>4</sub>@CFs aerogel was tested by PXRD and FTIR under different pH conditions.

Competitive ion adsorption experiments were performed at room temperature ( $m/V = 1$  g/L,  $m = 9$  mg,  $V = 9$  mL), and the adsorption time was 12 h for all of them. Sr<sup>2+</sup> removal experiments of the KInSnS<sub>4</sub>@CFs aerogel were performed in the presence of coexisting Na<sup>+</sup>, Cs<sup>+</sup>, Ca<sup>2+</sup>, and Mg<sup>2+</sup> ions. Sr<sup>2+</sup> removal experiments of KInSnS<sub>4</sub>@CFs aerogel in actual water samples were simulated by adding Sr<sup>2+</sup> ions to tap water, river water, and lake water. The filtered supernatant was diluted with 2% HNO<sub>3</sub> solution and finally tested by plasma mass spectrometry (ICP-MS) and ICP-OES.

Elution and reuse experiments were carried out as follows. Firstly, a certain amount

of  $\text{KInSnS}_4@\text{CFs}$  aerogel was added into 11.02 mg/L  $\text{Sr}^{2+}$  solution at room temperature and they contacted for 12 h to give the solid adsorption product  $\text{KInSnS}_4@\text{CFs-Sr}$ . Secondly,  $\text{KInSnS}_4@\text{CFs-Sr}$  was eluted with 1 mol/L KCl solution. Then, the reusability of  $\text{KInSnS}_4@\text{CFs}$  aerogels in the subsequent four consecutive cycles was evaluated by adsorbing the same initial concentration of  $\text{Sr}^{2+}$  ion solution and using 1 mol/L KCl solution for elution. Three adsorption-elution cycle experiments were carried out. The 1 mol/L KCl solution was configured using KCl and deionized water.

## 2. Equations.

The equations for the analysis of adsorption data are summarized as follows:

(1) Adsorption capacity  $q$  (mg/g):

$$q = \frac{(C_0 - C_e)V}{m} \quad (\text{Eq. S1})$$

where  $C_0$  (mg/L) and  $C_e$  (mg/L) are the initial and equilibrium concentration of target ions, respectively.  $m$  (g) and  $V$  (mL) are the mass of the adsorbent and the volume of the solution used in the adsorption experiment, respectively.

(2) Adsorption isotherm models:

The classical isotherm models including Langmuir isotherm model, Freundlich isotherm model, and Langmuir-Freundlich isotherm model are used to evaluate the maximum adsorption capacity ( $q_{\max}$ ) of the adsorbent for a target ion.

The Langmuir isotherm model is suitable for estimating monolayer chemisorption and localized physical adsorption on homogeneous surfaces with little interaction between adsorbates. Langmuir isotherm model is shown in below:<sup>1</sup>

$$q = q_{\max} \frac{K_L C_e}{1 + b C_e} \quad (\text{Eq. S2})$$

The Freundlich isotherm model typically describes multilayer adsorption on heterogeneous surfaces with an uncertain number of active binding sites. Freundlich isotherm model is shown in below:<sup>1</sup>

$$q = K_F C_e^{\frac{1}{n}} \quad (\text{Eq. S3})$$

The Langmuir-Freundlich isotherm model is an extension of the Langmuir and Freundlich isotherm model, which is simplified to Langmuir isotherm model with high surface coverage and Freundlich isotherm model with low surface coverage. Langmuir-Freundlich isotherm model is shown in below:<sup>2</sup>

$$q = q_{\max} \frac{(K_L C_e)^{\frac{1}{n}}}{1 + (K_L C_e)^{\frac{1}{n}}} \quad (\text{Eq. S4})$$

where  $q_m$  is the maximum adsorption capacity (mg/g);  $K_L$  is the Langmuir constant related to the affinity of the ion for the adsorbent (L/mg), and  $n$  is the density constant

at the adsorption site.  $K_F$  ( $\text{mg}^{1-1/n} \cdot \text{L}^{1/n}/\text{g}$ ) is the fitting parameter related to the adsorption capacity.

(3) Removal rate  $R$  (%):

$$R = \frac{(C_0 - C_e)}{C_0} \times 100\% \quad (\text{Eq. S5})$$

(4) Kinetics model:

Pseudo-first-order kinetics model is shown in below,<sup>3</sup>

$$\ln \frac{(q_e - q)}{q_e} = -k_1 t \quad (\text{Eq. S6})$$

Pseudo-second-order kinetics model is shown in below,<sup>4</sup>

$$\frac{t}{q} = \frac{1}{k_2 q_e^2} + \frac{1}{q_e} t \quad (\text{Eq. S7})$$

where  $k_1$  and  $k_2$  are pseudo-first-order and the pseudo-second-order rate constant of kinetics models, respectively. The pseudo-second-order rate expression has been widely applied to the adsorption of pollutants from aqueous solutions.

(5) Coefficient  $K_d$  (mL/g):

$$K_d = \frac{V(C_0 - C_e)}{m C_0} \quad (\text{Eq. S8})$$

(6) The column adsorption process of  $\text{Sr}^{2+}$  by  $\text{KInSnS}_4$ @CFs aerogel was further studied through Thomas models analysis.<sup>5</sup>

$$\frac{C_t}{C_0} = \frac{1}{1 + \exp(K_T q_e m / Q - K_T C_0 t)} \quad (\text{Eq. S9})$$

Where  $C_0$  (mg/L) and  $C_t$  (mg/L) are the concentrations at the initial and time  $t$  (min), respectively.  $K_T$  ( $\text{L} \cdot \text{min}^{-1} \cdot \text{mg}^{-1}$ ) is the rate constant in the Thomas model.  $q_e$  (mg/g) is the maximum adsorption capacity of the adsorbent,  $Q$  (L/min) is the volume flow rate, and  $m$  (g) is the mass of the adsorbent in the adsorption column.

### 3. Figure S1–Figure S13.

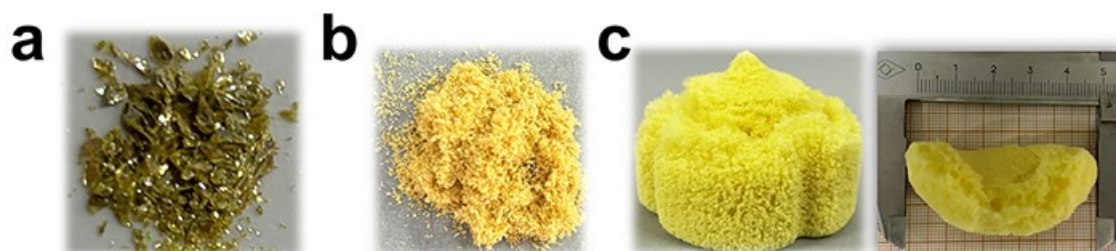

**Figure S1.** Photographs of  $\text{KInSnS}_4$  crystals (a), CFs (b), and  $\text{KInSnS}_4$ @CFs aerogel (c).

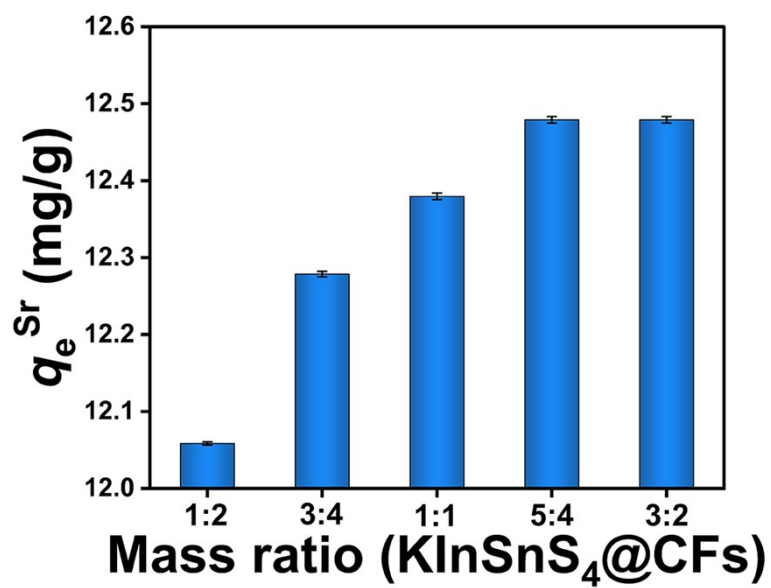

Figure S2.  $q_e$  of  $Sr^{2+}$  ions removal by  $KInSnS_4@CFs$  aerogel with different mass ratios.

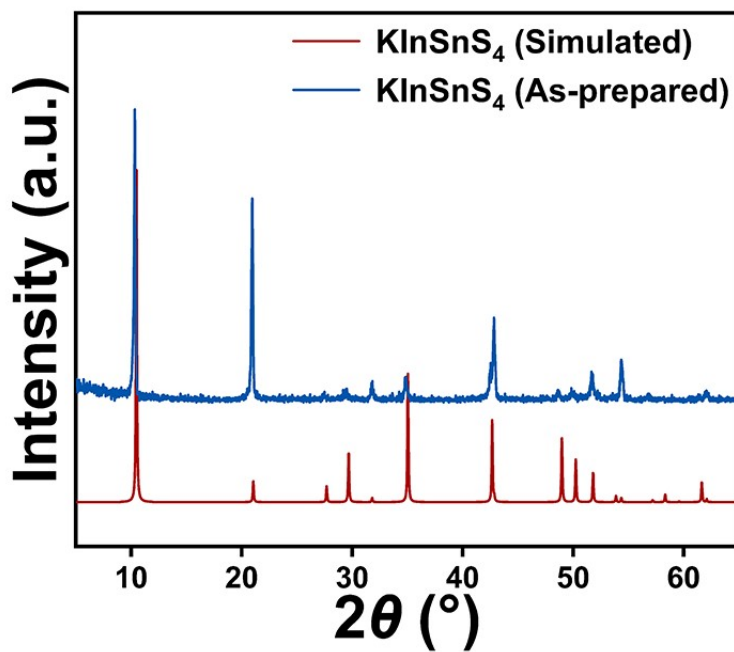

Figure S3. The simulated and as-prepared PXRD patterns of  $KInSnS_4$ .

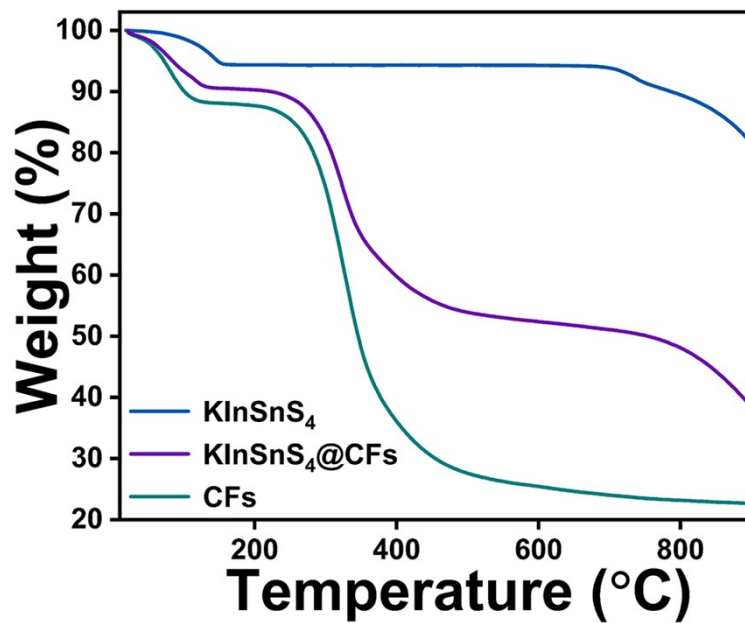

Figure S4. Thermogravimetric curves of  $\text{KInSnS}_4$ , CFs, and  $\text{KInSnS}_4$ @CFs aerogel.

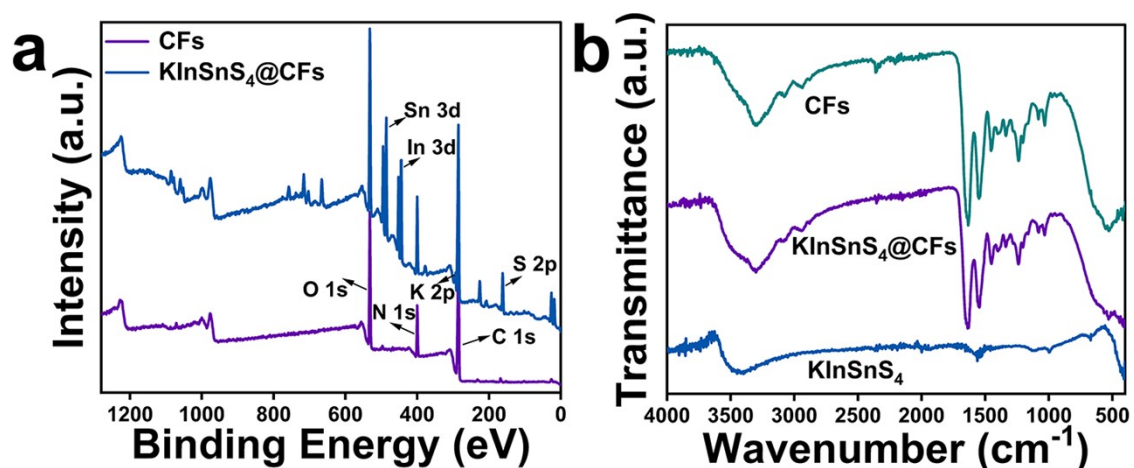

Figure S5. (a) XPS full spectra of CFs and  $\text{KInSnS}_4$ @CFs aerogel. (b) FTIR spectra of  $\text{KInSnS}_4$ , CFs, and  $\text{KInSnS}_4$ @CFs aerogel.

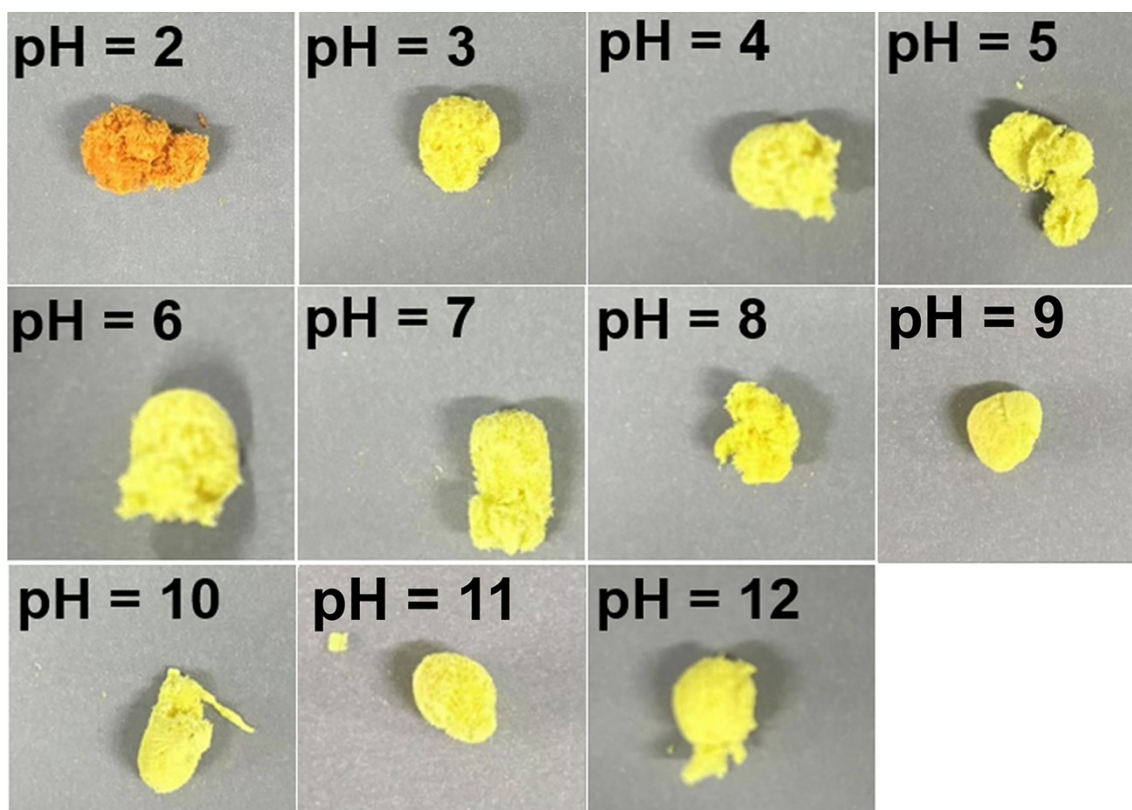

**Figure S6.** Photographs for products of  $\text{KInSn}_4\text{@CFs}$  aerogel after the treatment of  $\text{Sr}^{2+}$  ions solutions with different pH values.

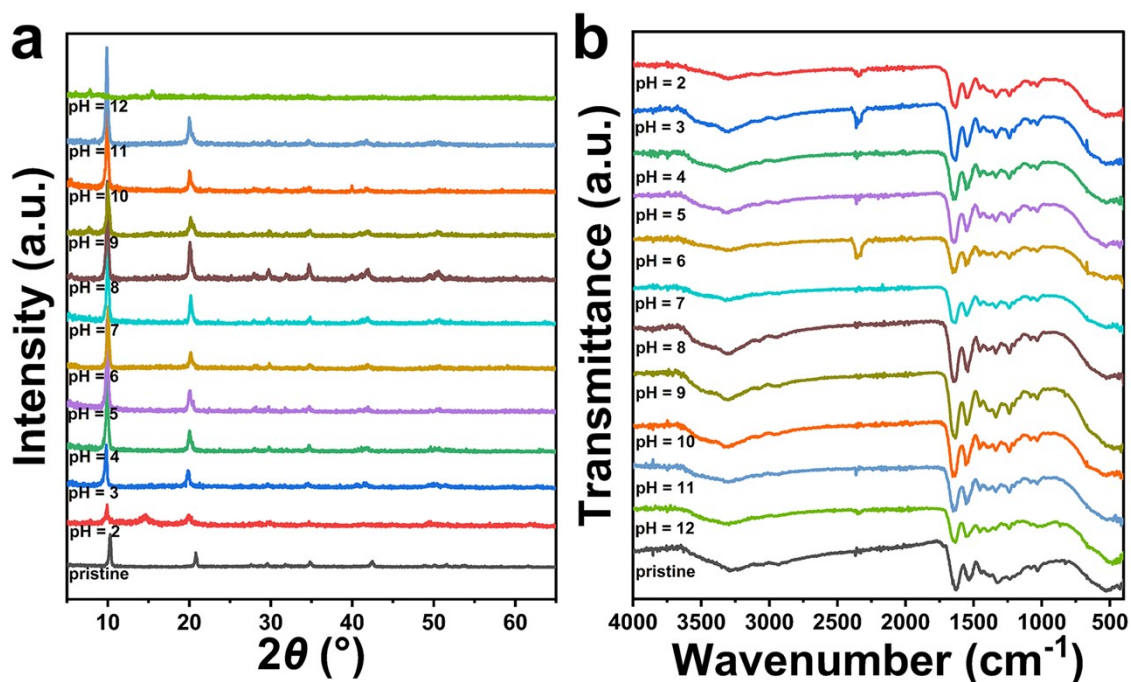

**Figure S7.** XRD (a) and FTIR (b) patterns of the pristine  $\text{KInSn}_4\text{@CFs}$  aerogel and those samples treating at different pH values.

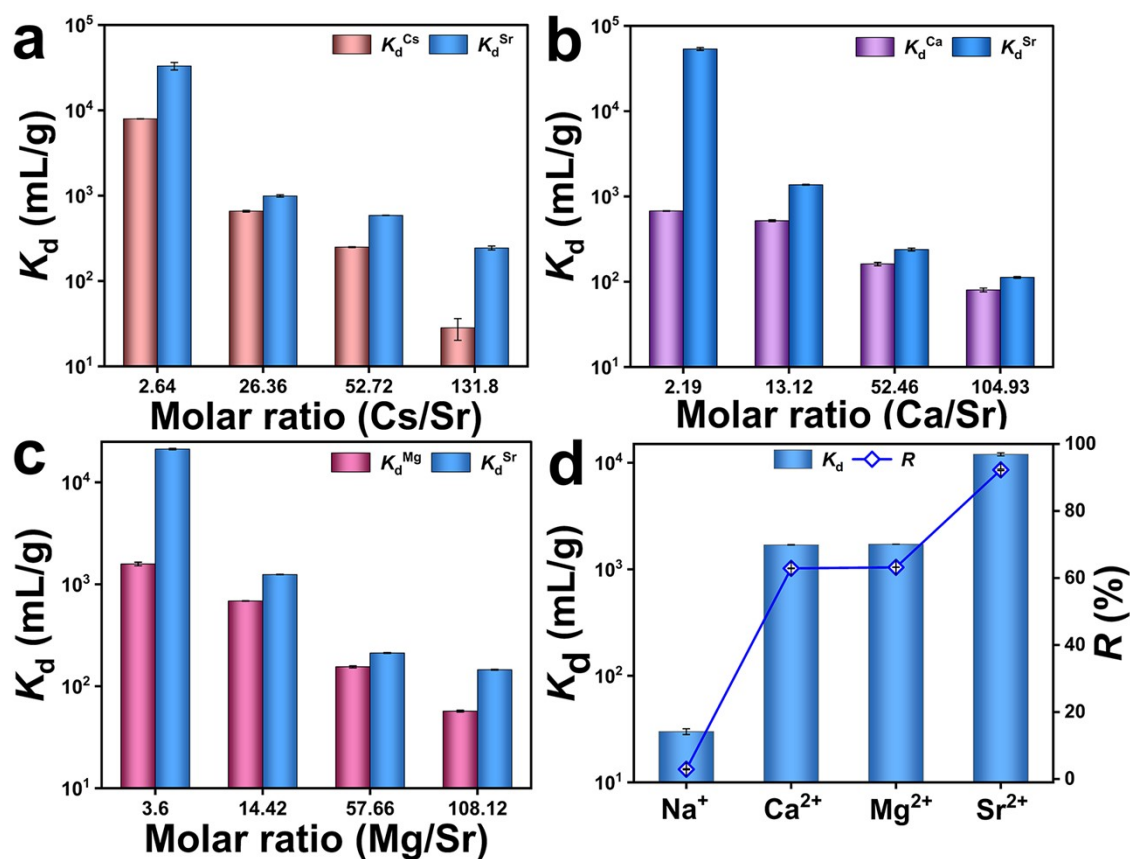

**Figure S8.** (a)  $K_d$  of  $\text{Cs}^+$  and  $\text{Sr}^{2+}$  ions by  $\text{KInSnS}_4@\text{CFs}$  aerogel with different  $\text{Cs}^+/\text{Sr}^{2+}$  molar ratios. (b)  $K_d$  of  $\text{Ca}^{2+}$  and  $\text{Sr}^{2+}$  ions by  $\text{KInSnS}_4@\text{CFs}$  aerogel with different  $\text{Ca}^{2+}/\text{Sr}^{2+}$  molar ratios. (c)  $K_d$  of  $\text{Mg}^{2+}$  and  $\text{Sr}^{2+}$  ions by  $\text{KInSnS}_4@\text{CFs}$  aerogel with different  $\text{Mg}^{2+}/\text{Sr}^{2+}$  molar ratios. (d)  $K_d$  and  $R$  of various ions by  $\text{KInSnS}_4@\text{CFs}$  aerogel at equal mass concentration of  $\text{Na}^+$ ,  $\text{Ca}^{2+}$ ,  $\text{Mg}^{2+}$ , and  $\text{Sr}^{2+}$ .

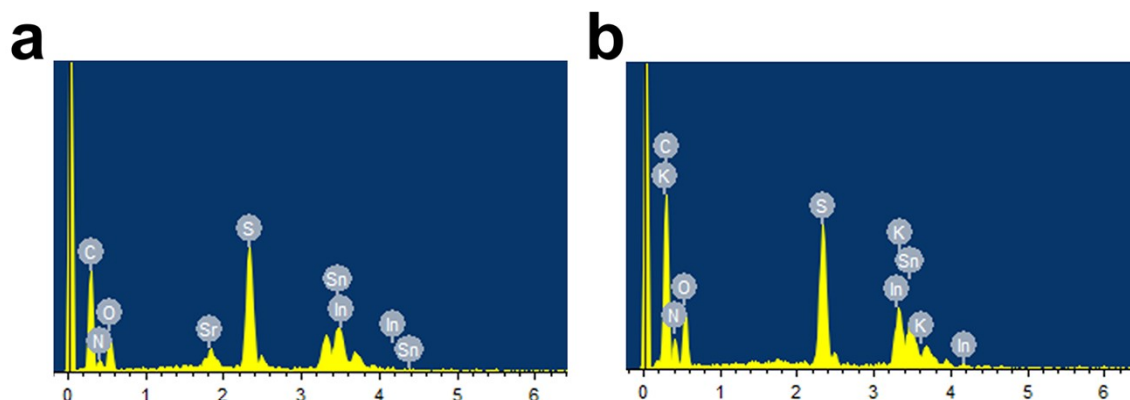

**Figure S9.** (a) EDS analysis results of  $\text{KInSnS}_4@\text{CFs-Sr}$ . (b) EDS analysis results of  $\text{KInSnS}_4@\text{CFs-Sr}$  after elution with 1 mol/L KCl solution.

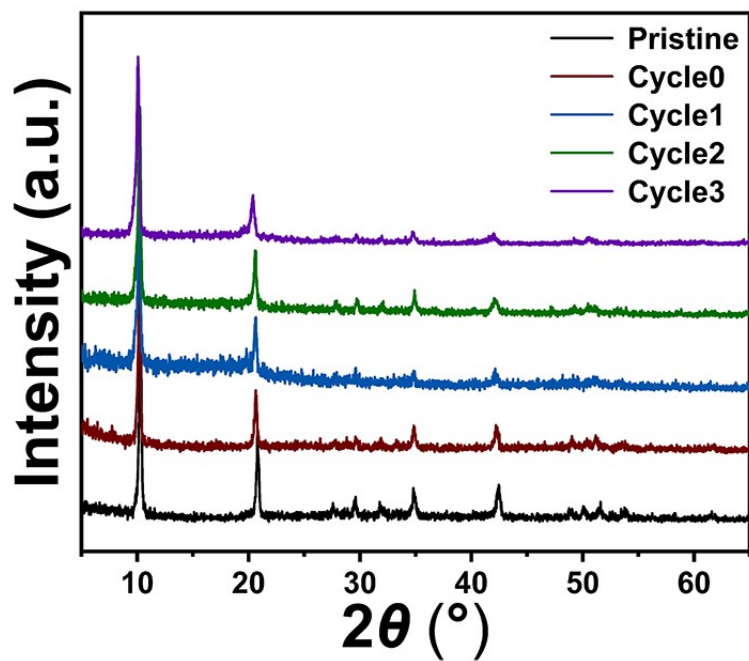

**Figure S10.** PXRD patterns of the pristine and the samples after each cycle

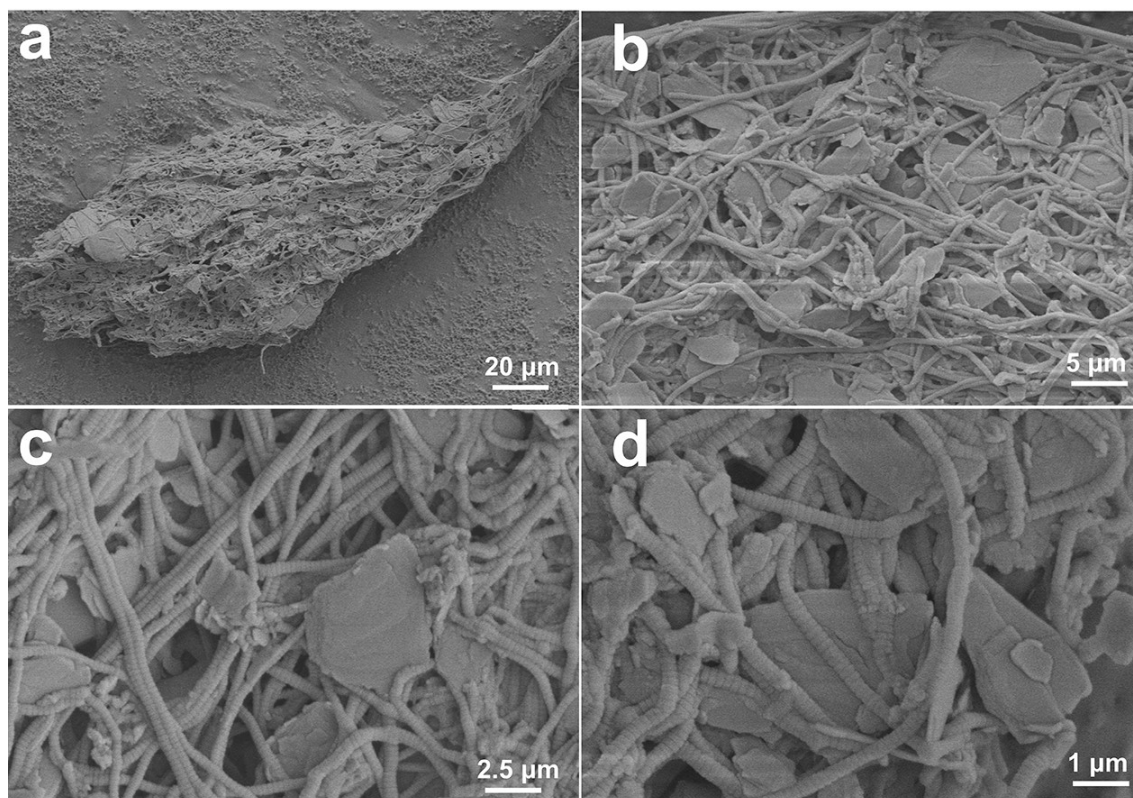

**Figure S11.** SEM images of KInSnS<sub>4</sub>@CFs aerogel with different resolutions, 2.5 k (a), 10 k (b), 20 k (c) and 30 k (d), respectively.



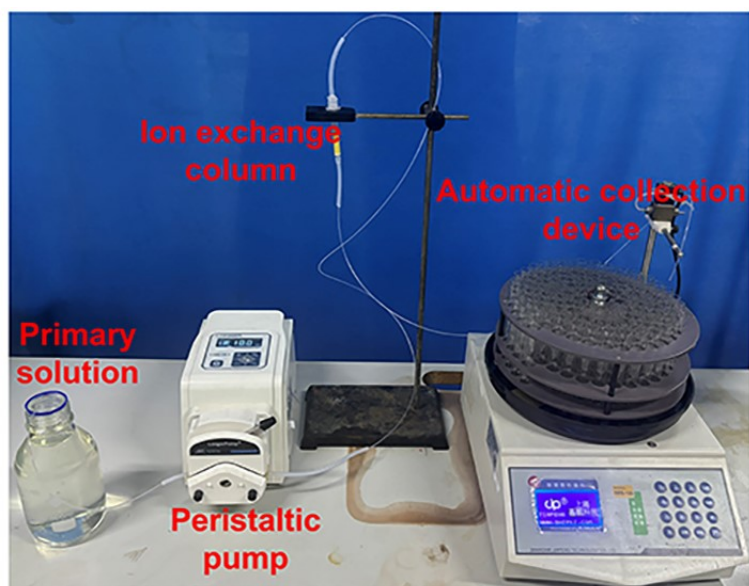

**Figure S12.** Experimental setup for the dynamic capture of  $\text{Sr}^{2+}$  ions using a column packed with  $\text{KInSnS}_4@\text{CFs}$  aerogel.

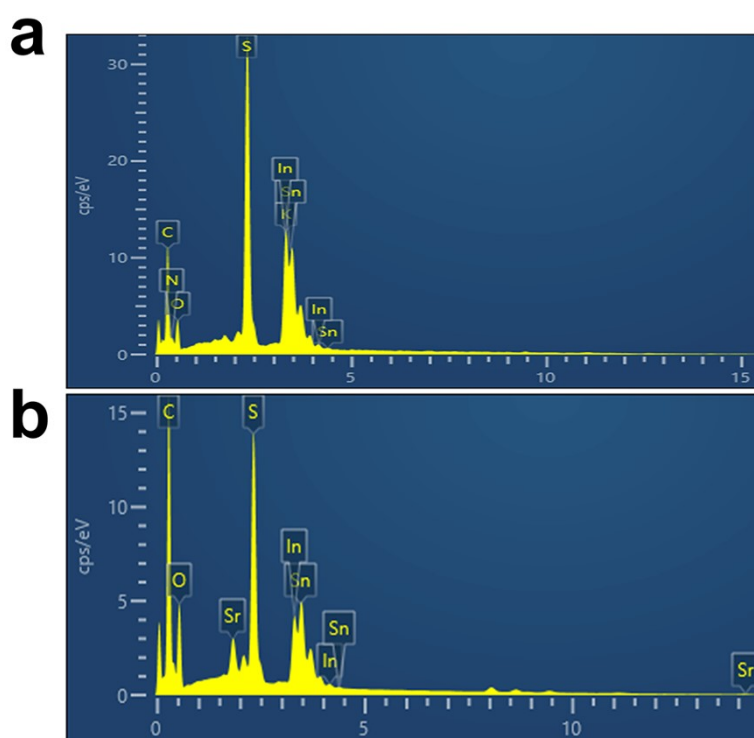

**Figure S13.** EDS analysis results of  $\text{KInSnS}_4@\text{CFs}$  aerogel (a) and  $\text{KInSnS}_4@\text{CFs-Sr}$  (b).

#### 4. Table S1–Table S19.

**Table S1.** Experimental results of adsorption capacity studies of KInSnS<sub>4</sub>@CFs aerogels with different mass ratios ( $m/V = 1000$  mg/L, room temperature and 12 h contact time).

| KInSnS <sub>4</sub> @CFs mass ratio | $C_0^{Sr}$ (mg/L) | $C_e^{Sr}$ (mg/L) | $q_e^{Sr}$ (mg/g) |
|-------------------------------------|-------------------|-------------------|-------------------|
| 1:2                                 | 12.66 ± 0.0064    | 0.61 ± 0.0085     | 12.06 ± 0.0021    |
| 3:4                                 | 12.66 ± 0.0064    | 0.39 ± 0.0028     | 12.28 ± 0.0035    |
| 1:1                                 | 12.66 ± 0.0064    | 0.29 ± 0.0021     | 12.38 ± 0.0042    |
| 5:4                                 | 12.66 ± 0.0064    | 0.19 ± 0.0021     | 12.48 ± 0.0042    |
| 3:2                                 | 12.66 ± 0.0064    | 0.19 ± 0.0021     | 12.48 ± 0.0042    |

**Table S2.** Experimental results of the adsorption capacity study of KInSnS<sub>4</sub>@CFs aerogel, KInSnS<sub>4</sub>, and CFs ( $m/V = 1000$  mg/L, at room temperature and 12 h contact time).

| Sample                           | $C_0^{Sr}$ (mg/L) | $C_e^{Sr}$ (mg/L) | $q_e^{Sr}$ (mg/g) |
|----------------------------------|-------------------|-------------------|-------------------|
| KInSnS <sub>4</sub> @CFs aerogel | 7.23 ± 0.070      | 0.0011 ± 0.00040  | 7.23 ± 0.070      |
|                                  | 14.58 ± 0.16      | 0.075 ± 0.0038    | 14.50 ± 0.17      |
|                                  | 30.00 ± 0.20      | 0.94 ± 0.00       | 29.06 ± 0.20      |
|                                  | 63.78 ± 0.25      | 26.76 ± 0.23      | 37.02 ± 0.030     |
|                                  | 95.69 ± 1.06      | 59.14 ± 0.057     | 36.55 ± 1.12      |
|                                  | 235.33 ± 0.10     | 196.73 ± 0.32     | 38.60 ± 0.21      |
| KInSnS <sub>4</sub>              | 4.59 ± 0.00       | 0.30 ± 0.055      | 4.29 ± 0.055      |
|                                  | 9.68 ± 0.028      | 0.26 ± 0.0040     | 9.42 ± 0.024      |
|                                  | 31.20 ± 0.17      | 0.54 ± 0.0010     | 30.66 ± 0.17      |
|                                  | 50.49 ± 0.55      | 0.81 ± 0.0040     | 49.68 ± 0.56      |
|                                  | 105.95 ± 1.13     | 25.54 ± 0.14      | 80.41 ± 1.27      |
|                                  | 149.5 ± 1.84      | 70.09 ± 1.46      | 79.42 ± 0.37      |
|                                  | 202.00 ± 0.99     | 119.60 ± 0.78     | 82.45 ± 1.77      |
| CFs                              | 0.24 ± 0.00       | 0.22 ± 0.0042     | 0.023 ± 0.0042    |
|                                  | 0.45 ± 0.00       | 0.42 ± 0.0014     | 0.033 ± 0.0014    |
|                                  | 0.77 ± 0.0057     | 0.73 ± 0.00       | 0.038 ± 0.0057    |
|                                  | 1.07 ± 0.0028     | 1.06 ± 0.0014     | 0.012 ± 0.011     |
|                                  | 3.20 ± 0.025      | 3.18 ± 0.0071     | 0.025 ± 0.033     |

**Table S3.** Adsorption constants obtained by fitting isotherm data with Langmuir model, Freundlich model and Langmuir-Freundlich model.

| Samples                          | Adsorption isotherm model | Langmuir model | Langmuir-Freundlich model | Freundlich model |
|----------------------------------|---------------------------|----------------|---------------------------|------------------|
| KInSnS <sub>4</sub> @CFs aerogel | $R^2$                     | 0.911          | 0.967                     | 0.885            |
|                                  | $q_{max}^{Sr}$ (mg/g)     | 36.74 ± 2.16   | 41.48 ± 3.77              |                  |
|                                  | $b$ (L/mg)                | 7.53 ± 3.43    | 5.49 ± 4.19               |                  |
|                                  | $n$                       |                | 2.58 ± 0.68               | 9.04 ± 1.90      |
|                                  | $k_F$                     |                |                           | 23.41 ± 2.30     |
| KInSnS <sub>4</sub>              | $R^2$                     | 0.923          | 0.992                     | 0.773            |
|                                  | $q_{max}^{Sr}$ (mg/g)     | 83.06 ± 5.75   | 80.7 ± 1.71               |                  |
|                                  | $b$ (L/mg)                | 0.97 ± 0.30    | 1.50 ± 0.070              |                  |
|                                  | $n$                       |                | 0.38 ± 0.045              | 4.53 ± 1.27      |
|                                  | $k_F$                     |                |                           | 31.58 ± 7.85     |

**Table S4.** Sn elemental contents in KInSnS<sub>4</sub> and KInSnS<sub>4</sub>@CFs aerogel.

| Sample                           | Sn content (mg/g) |
|----------------------------------|-------------------|
| KInSnS <sub>4</sub>              | 284.25 ± 20.15    |
| KInSnS <sub>4</sub> @CFs aerogel | 125.25 ± 7.42     |

**Table S5.** The Sr<sup>2+</sup> adsorption kinetics results of KInSnS<sub>4</sub>@CFs aerogel ( $m/V = 1000$  mg/L, at room temperature).

| $t$ (min) | $C_e^{Sr}$ (mg/L) | $R^{Sr}$ (%)   |
|-----------|-------------------|----------------|
| 0         | 16.15 ± 0.071     | 0.00           |
| 1         | 3.87 ± 0.014      | 76.04 ± 0.017  |
| 2         | 1.30 ± 0.0071     | 91.98 ± 0.0087 |
| 3         | 1.16 ± 0.00       | 92.82 ± 0.031  |
| 5         | 1.12 ± 0.0071     | 93.10 ± 0.014  |
| 7         | 1.11 ± 0.00       | 93.13 ± 0.030  |
| 10        | 1.12 ± 0.0071     | 93.10 ± 0.074  |
| 15        | 1.11 ± 0.00       | 93.13 ± 0.030  |
| 30        | 1.09 ± 0.00       | 93.25 ± 0.030  |
| 60        | 1.1 ± 0.00        | 93.19 ± 0.030  |
| 120       | 1.1 ± 0.0071      | 93.22 ± 0.014  |
| 180       | 1.1 ± 0.00        | 93.19 ± 0.030  |
| 300       | 1.09 ± 0.014      | 93.25 ± 0.058  |
| 420       | 1.09 ± 0.00       | 93.25 ± 0.030  |

**Table S6.** Kinetic fitting parameters of KInSnS<sub>4</sub>@CFs aerogel for Sr<sup>2+</sup> removal. ( $m/V = 1000$  mg/L, at room temperature).

|                           | $k_1$<br>(min <sup>-1</sup> ) | $k_2$<br>(g·mg <sup>-1</sup> ·min <sup>-1</sup> ) | $q_e^{Sr}$<br>(mg·L <sup>-1</sup> ) | $R^2$ |
|---------------------------|-------------------------------|---------------------------------------------------|-------------------------------------|-------|
| Pseudo-first-order model  | 1.72                          | -                                                 | 15.12                               | 0.99  |
| Pseudo-second-order model | -                             | 0.066                                             | 0.0026                              | 1.00  |

**Table S7.** The pH-dependent adsorption results of KInSnS<sub>4</sub>@CFs aerogel for Sr<sup>2+</sup> removal ( $m/V = 1000$  mg/L, at room temperature and 12 h contact time).

| pH | $C_0^{Sr}$ (mg/L) | $C_e^{Sr}$ (mg/L) | $K_d^{Sr}$ (mL/g)              | $R^{Sr}$ (%)    |
|----|-------------------|-------------------|--------------------------------|-----------------|
| 2  | 7.01 ± 0.014      | 2.01 ± 0.0057     | $2.49 \times 10^3 \pm 16.88$   | 71.36 ± 0.14    |
| 3  | 7.04 ± 0.00       | 0.41 ± 0.0028     | $1.62 \times 10^4 \pm 118.46$  | 94.18 ± 0.040   |
| 4  | 7.07 ± 0.071      | 0.13 ± 0.0013     | $5.30 \times 10^4 \pm 15.80$   | 98.15 ± 0.00054 |
| 5  | 7.11 ± 0.071      | 0.12 ± 0.00085    | $5.97 \times 10^4 \pm 164.12$  | 98.35 ± 0.0045  |
| 6  | 6.98 ± 0.11       | 0.15 ± 0.00057    | $4.69 \times 10^4 \pm 590.23$  | 97.91 ± 0.026   |
| 7  | 7.06 ± 0.00       | 0.13 ± 0.00071    | $5.52 \times 10^4 \pm 315.96$  | 98.22 ± 0.010   |
| 8  | 7.08 ± 0.028      | 0.13 ± 0.00029    | $5.36 \times 10^4 \pm 337.47$  | 98.17 ± 0.011   |
| 9  | 7.02 ± 0.028      | 0.18 ± 0.00071    | $3.85 \times 10^4 \pm 316.37$  | 97.47 ± 0.020   |
| 10 | 7.04 ± 0.11       | 0.12 ± 0.00042    | $5.93 \times 10^4 \pm 1188.79$ | 98.34 ± 0.033   |
| 11 | 7.08 ± 0.057      | 0.34 ± 0.00       | $2.00 \times 10^4 \pm 167.56$  | 95.23 ± 0.038   |
| 12 | 6.79 ± 0.042      | 0.75 ± 0.0071     | $8.11 \times 10^3 \pm 29.56$   | 89.02 ± 0.036   |

**Table S8.** The adsorption results of KInSnS<sub>4</sub>@CFs aerogel under different Na<sup>+</sup>/Sr<sup>2+</sup> molar ratios ( $m/V = 1000$  mg/L, at room temperature and 12 h contact time).

| Molar ratio (Na <sup>+</sup> /Sr <sup>2+</sup> ) | M                | C <sub>0</sub> <sup>M</sup> (mg/L) | C <sub>e</sub> <sup>M</sup> (mg/L) | K <sub>d</sub> <sup>M</sup> (mL/g) | R <sup>M</sup> (%) |
|--------------------------------------------------|------------------|------------------------------------|------------------------------------|------------------------------------|--------------------|
| 3.81                                             | Na <sup>+</sup>  | 6.43 ± 0.11                        | 5.66 ± 0.30                        | 138.15 ± 41.19                     | 12.08 ± 3.18       |
|                                                  | Sr <sup>2+</sup> | 4.97 ± 0.070                       | 0.040 ± 0.0085                     | 1.26 × 10 <sup>5</sup> ± 29.00     | 99.19 ± 0.18       |
| 15.24                                            | Na <sup>+</sup>  | 20.88 ± 0.020                      | 18.31 ± 0.11                       | 140.11 ± 8.20                      | 12.29 ± 0.63       |
|                                                  | Sr <sup>2+</sup> | 5.00 ± 0.028                       | 0.040 ± 0.0021                     | 1.26 × 10 <sup>5</sup> ± 61.00     | 99.21 ± 0.038      |
| 53.35                                            | Na <sup>+</sup>  | 70.57 ± 0.25                       | 63.69 ± 0.54                       | 108.13 ± 5.48                      | 9.76 ± 0.45        |
|                                                  | Sr <sup>2+</sup> | 5.04 ± 0.028                       | 0.097 ± 0.0028                     | 5.10 × 10 <sup>4</sup> ± 12.00     | 98.08 ± 0.045      |
| 152.44                                           | Na <sup>+</sup>  | 200.00 ± 0.85                      | 190.50 ± 0.99                      | 49.87 ± 1.00                       | 4.75 ± 0.091       |
|                                                  | Sr <sup>2+</sup> | 5.03 ± 0.028                       | 0.35 ± 0.0014                      | 1.34 × 10 <sup>4</sup> ± 22.64     | 93.06 ± 0.010      |

**Table S9.** The adsorption results of KInSnS<sub>4</sub>@CFs aerogel under different Cs<sup>+</sup>/Sr<sup>2+</sup> molar ratios ( $m/V = 1000$  mg/L, at room temperature and 12 h contact time).

| Molar ratio (Cs <sup>+</sup> /Sr <sup>2+</sup> ) | M                | C <sub>0</sub> <sup>M</sup> (mg/L) | C <sub>e</sub> <sup>M</sup> (mg/L) | K <sub>d</sub> <sup>M</sup> (mL/g) | R <sup>M</sup> (%) |
|--------------------------------------------------|------------------|------------------------------------|------------------------------------|------------------------------------|--------------------|
| 2.64                                             | Cs <sup>+</sup>  | 18.60 ± 0.057                      | 2.08 ± 0.00                        | 7.94 × 10 <sup>3</sup> ± 27.19     | 88.82 ± 0.034      |
|                                                  | Sr <sup>2+</sup> | 5.08 ± 0.014                       | 0.15 ± 0.014                       | 3.30 × 10 <sup>4</sup> ± 3302.00   | 97.05 ± 0.29       |
| 26.36                                            | Cs <sup>+</sup>  | 185.60 ± 0.57                      | 112.00 ± 0.57                      | 6.57 × 10 <sup>2</sup> ± 13.42     | 39.65 ± 0.49       |
|                                                  | Sr <sup>2+</sup> | 5.28 ± 0.028                       | 2.65 ± 0.028                       | 9.92 × 10 <sup>2</sup> ± 31.94     | 49.81 ± 0.80       |
| 52.72                                            | Cs <sup>+</sup>  | 374.80 ± 0.57                      | 300.00 ± 1.13                      | 2.50 × 10 <sup>2</sup> ± 2.83      | 19.96 ± 0.18       |
|                                                  | Sr <sup>2+</sup> | 5.25 ± 0.028                       | 3.31 ± 0.021                       | 5.88 × 10 <sup>2</sup> ± 1.64      | 37.05 ± 0.065      |
| 131.80                                           | Cs <sup>+</sup>  | 910.00 ± 5.66                      | 885.00 ± 1.41                      | 28.26 ± 8.04                       | 2.71 ± 0.76        |
|                                                  | Sr <sup>2+</sup> | 5.13 ± 0.035                       | 4.12 ± 0.014                       | 2.44 × 10 <sup>2</sup> ± 12.85     | 19.61 ± 0.83       |

**Table S10.** The adsorption results of KInSnS<sub>4</sub>@CFs aerogel under different Ca<sup>2+</sup>/Sr<sup>2+</sup> molar ratios ( $m/V = 1000$  mg/L, at room temperature and 12 h contact time).

| Molar ratio (Ca <sup>2+</sup> /Sr <sup>2+</sup> ) | M                | C <sub>0</sub> <sup>M</sup> (mg/L) | C <sub>e</sub> <sup>M</sup> (mg/L) | K <sub>d</sub> <sup>M</sup> (mL/g) | R <sup>M</sup> (%) |
|---------------------------------------------------|------------------|------------------------------------|------------------------------------|------------------------------------|--------------------|
| 2.19                                              | Ca <sup>2+</sup> | 12.06 ± 0.035                      | 7.20 ± 0.042                       | 6.74 × 10 <sup>2</sup> ± 4.96      | 40.27 ± 0.18       |
|                                                   | Sr <sup>2+</sup> | 5.05 ± 0.00                        | 0.092 ± 0.0030                     | 5.36 × 10 <sup>4</sup> ± 21.00     | 98.17 ± 0.070      |
| 13.12                                             | Ca <sup>2+</sup> | 32.51 ± 0.13                       | 21.40 ± 0.092                      | 5.19 × 10 <sup>2</sup> ± 12.81     | 34.18 ± 0.55       |
|                                                   | Sr <sup>2+</sup> | 5.04 ± 0.021                       | 2.13 ± 0.0070                      | 1.40 × 10 <sup>3</sup> ± 17.87     | 57.8 ± 0.32        |
| 52.46                                             | Ca <sup>2+</sup> | 109.60 ± 0.99                      | 94.38 ± 0.28                       | 1.61 × 10 <sup>2</sup> ± 7.10      | 13.89 ± 0.53       |
|                                                   | Sr <sup>2+</sup> | 5.04 ± 0.064                       | 4.07 ± 0.021                       | 2.38 × 10 <sup>2</sup> ± 9.20      | 19.26 ± 0.60       |
| 104.93                                            | Ca <sup>2+</sup> | 211.60 ± 0.57                      | 195.90 ± 1.27                      | 80.16 ± 4.13                       | 7.42 ± 0.35        |
|                                                   | Sr <sup>2+</sup> | 5.00 ± 0.028                       | 4.50 ± 0.035                       | 112.36 ± 2.46                      | 10.10 ± 0.20       |

**Table S11.** The adsorption results of KInSnS<sub>4</sub>@CFs aerogel under different Mg<sup>2+</sup>/Sr<sup>2+</sup> molar ratios ( $m/V = 1000$  mg/L, at room temperature and 12 h contact time).

| Molar ratio (Mg <sup>2+</sup> /Sr <sup>2+</sup> ) | M                | C <sub>0</sub> <sup>M</sup> (mg/L) | C <sub>e</sub> <sup>M</sup> (mg/L) | K <sub>d</sub> <sup>M</sup> (mL/g) | R <sup>M</sup> (%) |
|---------------------------------------------------|------------------|------------------------------------|------------------------------------|------------------------------------|--------------------|
| 3.60                                              | Mg <sup>2+</sup> | 7.00 ± 0.28                        | 2.71 ± 0.042                       | 1.58 × 10 <sup>3</sup> ± 63.94     | 61.27 ± 0.96       |
|                                                   | Sr <sup>2+</sup> | 4.96 ± 0.028                       | 0.22 ± 0.0050                      | 2.12 × 10 <sup>4</sup> ± 365.02    | 95.49 ± 0.070      |
| 14.42                                             | Mg <sup>2+</sup> | 21.36 ± 0.050                      | 12.67 ± 0.00                       | 6.85 × 10 <sup>2</sup> ± 3.91      | 40.67 ± 0.14       |
|                                                   | Sr <sup>2+</sup> | 5.17 ± 0.014                       | 2.30 ± 0.00                        | 1.25 × 10 <sup>3</sup> ± 6.15      | 55.51 ± 0.12       |
| 57.66                                             | Mg <sup>2+</sup> | 77.47 ± 0.58                       | 67.06 ± 0.29                       | 1.55 × 10 <sup>2</sup> ± 3.65      | 13.42 ± 0.27       |
|                                                   | Sr <sup>2+</sup> | 4.98 ± 0.035                       | 4.11 ± 0.021                       | 2.12 × 10 <sup>2</sup> ± 2.35      | 17.49 ± 0.16       |
| 108.12                                            | Mg <sup>2+</sup> | 139.05 ± 0.071                     | 131.55 ± 0.21                      | 57.01 ± 1.17                       | 5.39 ± 0.10        |
|                                                   | Sr <sup>2+</sup> | 5.09 ± 0.0071                      | 4.44 ± 0.00                        | 1.45 × 10 <sup>2</sup> ± 1.59      | 12.68 ± 0.12       |

**Table S12.** The adsorption results of KInSnS<sub>4</sub>@CFs aerogel at equal molar ions concentration of Na<sup>+</sup>, Ca<sup>2+</sup>, Mg<sup>2+</sup> and Sr<sup>2+</sup> ( $m/V = 1000$  mg/L, at room temperature and 12 h contact time).

| M                | C <sub>0</sub> <sup>M</sup> (mg/L) | C <sub>e</sub> <sup>M</sup> (mg/L) | R <sup>M</sup> (%) | K <sub>d</sub> <sup>M</sup> (mL/g) |
|------------------|------------------------------------|------------------------------------|--------------------|------------------------------------|
| Na <sup>+</sup>  | 1.61 ± 0.0040                      | 1.59 ± 0.00                        | 1.40 ± 0.20        | 14.15 ± 2.20                       |
| Ca <sup>2+</sup> | 2.45 ± 0.020                       | 1.57 ± 0.030                       | 35.94 ± 1.60       | 5.61 × 10 <sup>2</sup> ± 39.80     |
| Mg <sup>2+</sup> | 1.76 ± 0.0060                      | 0.52 ± 0.020                       | 70.28 ± 1.10       | 2.37 × 10 <sup>3</sup> ± 3.50      |
| Sr <sup>2+</sup> | 4.93 ± 0.030                       | 0.10 ± 0.010                       | 97.99 ± 0.20       | 4.90 × 10 <sup>4</sup> ± 13.40     |

**Table S13.** The adsorption results by KInSnS<sub>4</sub>@CFs aerogel at equal mass ions concentration of Na<sup>+</sup>, Ca<sup>2+</sup>, Mg<sup>2+</sup> and Sr<sup>2+</sup> ( $m/V = 1000$  mg/L, at room temperature and 12 h contact time).

| M                | C <sub>0</sub> <sup>M</sup> (mg/L) | C <sub>e</sub> <sup>M</sup> (mg/L) | R <sup>M</sup> (%) | K <sub>d</sub> <sup>M</sup> (mL/g) |
|------------------|------------------------------------|------------------------------------|--------------------|------------------------------------|
| Na <sup>+</sup>  | 5.76 ± 0.02                        | 5.59 ± 0.011                       | 2.91 ± 0.17        | 29.98 ± 1.84                       |
| Ca <sup>2+</sup> | 5.71 ± 0.028                       | 2.12 ± 0.0035                      | 62.88 ± 0.12       | 1.69 × 10 <sup>3</sup> ± 8.86      |
| Mg <sup>2+</sup> | 5.51 ± 0.035                       | 2.03 ± 0.011                       | 63.20 ± 0.040      | 1.72 × 10 <sup>3</sup> ± 3.22      |
| Sr <sup>2+</sup> | 5.13 ± 0.0070                      | 0.40 ± 0.011                       | 92.30 ± 0.23       | 1.20 × 10 <sup>4</sup> ± 382.88    |

**Table S14.** The results on Sr<sup>2+</sup> ions removal by KInSnS<sub>4</sub>@CFs aerogel in actual water samples contaminated with Sr<sup>2+</sup> ions ( $m/V = 1000$  mg/L, at room temperature and 12 h contact time).

| Water                            | C <sub>0</sub> <sup>Sr</sup> (mg/L) | C <sub>e</sub> <sup>Sr</sup> (mg/L) | K <sub>d</sub> <sup>Sr</sup> (mL/g) | R <sup>Sr</sup> (%) |
|----------------------------------|-------------------------------------|-------------------------------------|-------------------------------------|---------------------|
| Tap water (Fuzhou, Fujian)       | 5.38 ± 0.025                        | 0.41 ± 0.016                        | 1.22 × 10 <sup>4</sup> ± 44.00      | 92.40 ± 0.25        |
| Lake water (Qishan Lake, Fuzhou) | 5.33 ± 0.00                         | 1.19 ± 0.0070                       | 3.50 × 10 <sup>3</sup> ± 26.85      | 77.78 ± 0.13        |
| River water (Fuzhou, Fujian)     | 5.29 ± 0.02                         | 0.32 ± 0.0030                       | 1.55 × 10 <sup>4</sup> ± 102.00     | 93.94 ± 0.038       |

**Table S15.** The concentration of K<sup>+</sup>, Na<sup>+</sup>, Ca<sup>2+</sup>, and Mg<sup>2+</sup> ions in tap water, lake water, and river water.

| Water                               | C <sub>0</sub> <sup>K</sup> (mg/L) | C <sub>0</sub> <sup>Na</sup> (mg/L) | C <sub>0</sub> <sup>Ca</sup> (mg/L) | C <sub>0</sub> <sup>Mg</sup> (mg/L) |
|-------------------------------------|------------------------------------|-------------------------------------|-------------------------------------|-------------------------------------|
| Tap water<br>(Fuzhou, Fujian)       | 3.40 ± 0.092                       | 9.85 ± 0.028                        | 10.46 ± 0.050                       | 1.71 ± 0.021                        |
| Lake water<br>(Qishan Lake, Fuzhou) | 5.06 ± 0.21                        | 14.57 ± 0.050                       | 14.64 ± 0.050                       | 2.54 ± 0.0071                       |
| River water<br>(Fuzhou, Fujian)     | 2.35 ± 0.29                        | 6.59 ± 0.0071                       | 12.16 ± 0.014                       | 1.85 ± 0.0071                       |

**Table S16.** The results on Sr<sup>2+</sup> ions removal by KInSnS<sub>4</sub>@CFs aerogel in the cyclic experiments ( $m/V = 1000$  mg/L, at room temperature and 12 h contact time).

| Cycles | C <sub>0</sub> <sup>Sr</sup> (mg/L) | C <sub>e</sub> <sup>Sr</sup> (mg/L) | R <sup>Sr</sup> (%) |
|--------|-------------------------------------|-------------------------------------|---------------------|
| 1      | 11.02 ± 0.078                       | 0.079 ± 0.00040                     | 99.28 ± 0.0090      |
| 2      | 11.02 ± 0.078                       | 0.12 ± 0.00040                      | 98.88 ± 0.010       |
| 3      | 11.02 ± 0.078                       | 0.11 ± 0.00010                      | 99.04 ± 0.0056      |

**Table S17.** Results of adsorption column experiments of KInSnS<sub>4</sub>@CFs aerogel ( $C_0^{Sr} = 10.425$  mg/L, room temperature).

| $t$ (min) | $C_t$ (mg/L)     | $C_t/C_0$           | $R^{Sr}$ (%)     |
|-----------|------------------|---------------------|------------------|
| 0         | 0                | 0                   | 0                |
| 2.5       | 0.062 ± 0.013    | 0.0059 ± 0.0012     | 99.41 ± 0.12     |
| 12.5      | 0.042 ± 0.0048   | 0.0041 ± 0.00045    | 99.60 ± 0.045    |
| 17.5      | 0.043 ± 0.00028  | 0.0041 ± 0.000036   | 99.59 ± 0.0036   |
| 32.5      | 0.039 ± 0.000071 | 0.0037 ± 0.00000074 | 99.63 ± 0.000074 |
| 42.5      | 0.041 ± 0.00035  | 0.0039 ± 0.000026   | 99.61 ± 0.0026   |
| 52.5      | 0.039 ± 0.00035  | 0.0038 ± 0.000042   | 99.62 ± 0.0042   |
| 62.5      | 0.037 ± 0.00092  | 0.0036 ± 0.000081   | 99.64 ± 0.0054   |
| 87.5      | 0.038 ± 0.00064  | 0.0036 ± 0.000054   | 99.64 ± 0.00061  |
| 97.5      | 0.038 ± 0.00014  | 0.0037 ± 0.0000061  | 99.63 ± 0.00014  |
| 107.5     | 0.039 ± 0.00085  | 0.0037 ± 0.0000074  | 99.63 ± 0.0074   |
| 132.5     | 0.075 ± 0.0018   | 0.0072 ± 0.00016    | 99.28 ± 0.0016   |
| 137.5     | 0.08 ± 0.0026    | 0.0077 ± 0.00024    | 99.23 ± 0.0024   |
| 147.5     | 0.14 ± 0.00064   | 0.014 ± 0.000089    | 98.65 ± 0.0089   |
| 157.5     | 0.21 ± 0.00099   | 0.021 ± 0.00014     | 97.94 ± 0.014    |
| 172.5     | 0.36 ± 0.0023    | 0.034 ± 0.00029     | 96.57 ± 0.029    |
| 182.5     | 0.46 ± 0.0018    | 0.044 ± 0.00026     | 95.57 ± 0.026    |
| 197.5     | 0.57 ± 0.0015    | 0.055 ± 0.00025     | 94.52 ± 0.025    |
| 202.5     | 0.63 ± 0.0036    | 0.060 ± 0.00022     | 93.96 ± 0.022    |
| 242.5     | 0.89 ± 0.013     | 0.086 ± 0.0014      | 91.44 ± 0.088    |
| 272.5     | 1.06 ± 0.0071    | 0.10 ± 0.00088      | 89.88 ± 0.18     |
| 347.5     | 2.02 ± 0.014     | 0.19 ± 0.0018       | 80.62 ± 0.54     |
| 422.5     | 3.36 ± 0.050     | 0.32 ± 0.0054       | 67.82 ± 0.82     |
| 452.5     | 3.89 ± 0.078     | 0.37 ± 0.0082       | 62.73 ± 0.18     |
| 497.5     | 4.56 ± 0.028     | 0.44 ± 0.0018       | 56.26 ± 0.12     |
| 617.5     | 6.00 ± 0.00      | 0.58 ± 0.0012       | 42.45 ± 0.73     |
| 632.5     | 6.10 ± 0.063     | 0.58 ± 0.0073       | 41.53 ± 0.26     |
| 647.5     | 6.45 ± 0.014     | 0.62 ± 0.0026       | 38.13 ± 0.14     |
| 652.5     | 6.53 ± 0.028     | 0.63 ± 0.0014       | 37.36 ± 0.66     |
| 852.5     | 9.54 ± 0.05      | 0.91 ± 0.0066       | 8.54 ± 0.051     |
| 872.5     | 9.55 ± 0.014     | 0.92 ± 0.00051      | 8.40 ± 0.56      |
| 897.5     | 9.63 ± 0.078     | 0.92 ± 0.0056       | 7.67 ± 0.078     |

**Table S18.** Thomas model fitting parameters for column experimental data at room temperature.

| Solution                            | $K_T$ (L·min <sup>-1</sup> ·mg <sup>-1</sup> ) | $q_e$ (mg/g) | $R^2$ |
|-------------------------------------|------------------------------------------------|--------------|-------|
| 10.43 ± 0.024 mg/L Sr <sup>2+</sup> | $7.03 \times 10^{-4} \pm 2.66 \times 10^{-5}$  | 58.64 ± 0.64 | 0.99  |

**Table S19.** The concentration of Sr<sup>2+</sup> and K<sup>+</sup> ions in solution after Sr<sup>2+</sup> adsorption by KInSnS<sub>4</sub>@CFs aerogel.

| Ion              | C <sub>0</sub> <sup>M</sup> (mg/L) | C <sub>e</sub> <sup>M</sup> (mg/L) |
|------------------|------------------------------------|------------------------------------|
| Sr <sup>2+</sup> | 46.54 ± 0.37                       | 26.28 ± 0.26                       |
| K <sup>+</sup>   | 0.020 ± 0.00078                    | 17.67 ± 0.17                       |

## References

1. K. Y. Foo and B. H. Hameed, Insights into the modeling of adsorption isotherm systems, *Chem. Eng. J.*, 2010, **156**, 2-10.
2. O. Altin, H. O. Ozbelge and T. Dogu, Use of general purpose adsorption isotherms for heavy metal clay mineral interactions, *J. Colloid Interface Sci.*, 1998, **198**, 130-140.
3. S. Azizian, Kinetic models of sorption: a theoretical analysis, *J. Colloid Interface Sci.*, 2004, **276**, 47-52.
4. Y. S. Ho, Review of second-order models for adsorption systems, *J. Hazard. Mater.*, 2006, **136**, 681-689.
5. T. Mathialagan and T. Viraraghavan, Adsorption of cadmium from aqueous solutions by perlite, *J. Hazard. Mater.*, 2002, **94**, 291-303.
